# Supplementary material for: Herpes simplex encephalitis is linked with selective mitochondrial damage; a post-mortem and in vitro study
Source: PubMed Central journal article supplement (PMC4992034; doi:10.1007/s00401-016-1597-2), 2016-07-25
Supplement: 401_2016_1597_MOESM1_ESM.pdf [file 401_2016_1597_MOESM1_ESM.pdf]

**File:** ESM\_1 (Online Resource 1)

**Article Title:** Herpes Simplex encephalitis is linked with selective mitochondrial damage; a post-mortem and in-vitro study.

**Journal Name:** Acta Neuropathologica

**Authors:** Małgorzata Wnęk, Lorenzo Ressel, Emanuele Ricci, Carmen Martinez, Julio Cesar Villalvazo Guerrero, Zarini Ismail, Patrick F. Chinnery, Colin Smith, Anja Kipar, Beate Sodeik, Tom Solomon, Michael J. Griffiths

**Corresponding Author:** Dr Michael J. Griffiths; e-mail: [griffmj@liverpool.ac.uk](mailto:griffmj@liverpool.ac.uk); tel: +44-151-795-9657; fax: +44-151-795-5529

**Table S1** Patient information

| <b>Patient</b> | <b>Age<br/>(yrs)</b> | <b>Sex</b> | <b>PMI<br/>(hrs)</b> | <b>Duration of illness/cause of death</b> |
|----------------|----------------------|------------|----------------------|-------------------------------------------|
| HSE            | 58                   | M          | 48                   | 9 days illness                            |
| HSE            | 53                   | M          | 60                   | 3 weeks illness                           |
| HSE            | 81                   | F          | N/A                  | 7 days illness                            |
| Control        | 70                   | M          | 48                   | Head injury 2 months before death         |
| Control        | 77                   | M          | 54                   | Pneumonia and myocardial infarction       |
| Control        | 64                   | M          | >48                  | Myocardial infarction                     |
| Control        | 80                   | F          | 24                   | Bronchopneumonia                          |
| Control        | 89                   | F          | 27                   | Bronchopneumonia                          |

PMI (post-mortem interval) – time from death to post-mortem

**Table S2** Summary results for pathological examination of Herpes simplex virus encephalitis cases

| CaseID    | Anatomic regions |                 |             |                 |        |          |
|-----------|------------------|-----------------|-------------|-----------------|--------|----------|
|           | Frontal cortex   | Temporal cortex | Hippocampus | Cingulate gyrus | Insula | Amygdala |
| B3918 - A | +                | +               | +           | +               | na     | ++       |
| B5125 - B | +++              | +++             | +++         | ++              | ++     | +++      |
| B5614 - C | +++              | +++*            | +++         | +               | ++     | ++       |

**Legend:**

+ Viral Inclusions, neuronal necrosis and small perivascular cuffs are observed

++ In addition to above, marked gliosis, leukocytoclastic vasculitis (fibrinoid necrosis of vessels) and diffuse perivascular cuffs with lymphocyte infiltration of adjacent parenchyma

+++ As above but multiple large focal areas of haemorrhage and parenchymal rarefaction/cavitation

\* - numerous astrocytic inclusion bodies observed; na: not available

**Table S3** Mitochondrial and nuclear genes down-regulated in HSE cases versus controls

| <b>Mitochondrial genes (n = 28)</b> |           |         |           | <b>Nuclear genes (n = 37)</b> |           |              |           |
|-------------------------------------|-----------|---------|-----------|-------------------------------|-----------|--------------|-----------|
| Gene                                | Fold chg. | Gene    | Fold chg. | Gene                          | Fold chg. | Gene         | Fold chg. |
| MT-TP                               | -214.3    | MT-ATP6 | -4.3      | NRGN                          | -80.8     | A_23_P406928 | -3.2      |
| MT-TK                               | -130.0    | MT-TF   | -4.0      | MT3                           | -42.1     | AGAP2        | -3.1      |
| MT-TC                               | -128.6    | MT-TG   | -3.9      | MAP1A                         | -12.7     | LOC100288578 | -3.0      |
| MT-TH                               | -84.8     | MT-RNR1 | -3.8      | PEA15                         | -11.6     | KIF1A        | -3.0      |
| MT-TT                               | -32.8     | MT-RNR2 | -3.6      | RPS3                          | -10.1     | BX095413     | -2.7      |
| MT-TM                               | -23.0     | MT-CO1  | -3.5      | GDI1                          | -9.6      | PALM         | -2.6      |
| MT-TE                               | -16.0     | MT-ND2  | -3.3      | RNA28S5                       | -9.4      | NDRG2        | -2.4      |
| MT-TI                               | -14.4     | MT-TY   | -3.2      | FLJ44606                      | -9.0      | RPS28        | -2.3      |
| MT-TW                               | -10.5     | MT-CO3  | -3.1      | IDS                           | -7.5      | AK129645     | -2.2      |
| MT-ND4                              | -10.5     | MT-ND3  | -3.0      | ILDR1                         | -5.4      | TM9SF4       | -2.2      |
| MT-TA                               | -7.2      | MT-ND6  | -2.9      | ZNF2                          | -5.3      | ES309389     | -2.2      |
| MT-TR                               | -6.7      | MT-ND5  | -2.8      | HSCB                          | -5.2      | A_23_P317056 | -2.1      |
| MT-ATP8                             | -5.7      | MT-CYB  | -2.5      | MAOA                          | -4.8      | MTND4P12     | -2.0      |
| MT-TN                               | -4.9      | MT-CO2  | -1.9      | NCRNA00087                    | -4.6      | LOC100288418 | -1.7      |
|                                     |           |         |           | ENST00000454092               | -4.5      | EPB49        | -1.6      |
|                                     |           |         |           | DDX6                          | -3.7      | KIF1C        | -1.2      |
|                                     |           |         |           | LAMA5-003                     | -3.6      | CALM3        | -1.0      |
|                                     |           |         |           | DACT3                         | -3.5      | RNA18S5      | -0.8      |
|                                     |           |         |           | A_24_P182122                  | -3.2      |              |           |

All transcripts exhibited significantly lower abundance among HSE cases (n=3) compared to controls (n=5) (FDR<5%). Fold change of replicate transcripts in the set were collapsed to their arithmetic mean.

**Table S4** Mitochondria-related categories over-represented with transcripts significantly less abundant in HSE cases

| Gene Ontology / Pathway              | Small molecule metabolic process | Respiratory electron transport chain | Mitochondrion | Oxidation-reduction process | Mitochondrial respiratory chain complex I | Mitochondrial electron transport, cyt c to oxygen | Response to oxidative stress | ATP synthesis coupled electron transport | ATP synthesis coupled proton transport |
|--------------------------------------|----------------------------------|--------------------------------------|---------------|-----------------------------|-------------------------------------------|---------------------------------------------------|------------------------------|------------------------------------------|----------------------------------------|
| <b>Genes in differential dataset</b> | 13                               | 11                                   | 10            | 7                           | 5                                         | 3                                                 | 3                            | 3                                        | 2                                      |
| <b>Genes in InnateDb</b>             | 1283                             | 103                                  | 1408          | 495                         | 47                                        | 5                                                 | 124                          | 7                                        | 20                                     |
| <b>P raw</b>                         | 0.000                            | 0.000                                | 0.000         | 0.000                       | 0.000                                     | 0.000                                             | 0.001                        | 0.000                                    | 0.001                                  |
| <b>P corrected</b>                   | 0.000                            | 0.000                                | 0.003         | 0.001                       | 0.000                                     | 0.000                                             | 0.019                        | 0.000                                    | 0.009                                  |
| <b>Genes</b>                         | IDS                              | MT-ATP6                              | AGAP2         | MAOA                        | MT-ND2                                    | MT-CO1                                            | MT-CO1                       | MT-ND2                                   | MT-ATP6                                |
|                                      | MAOA                             | MT-ATP8                              | C5orf63       | MT-CO1                      | MT-ND3                                    | MT-CO2                                            | MT-ND3                       | MT-ND4                                   | MT-ATP8                                |
|                                      | MT-ATP6                          | MT-CO1                               | MAOA          | MT-ND2                      | MT-ND4                                    | MT-CO3                                            | MT3                          | MT-ND5                                   |                                        |
|                                      | MT-ATP8                          | MT-CO2                               | MT-ATP6       | MT-ND3                      | MT-ND5                                    |                                                   |                              |                                          |                                        |
|                                      | MT-CO1                           | MT-CO3                               | MT-ATP8       | MT-ND4                      | MT-ND6                                    |                                                   |                              |                                          |                                        |
|                                      | MT-CO2                           | MT-CYB                               | MT-CO2        | MT-ND5                      |                                           |                                                   |                              |                                          |                                        |
|                                      | MT-CO3                           | MT-ND2                               | MT-CYB        | MT-ND6                      |                                           |                                                   |                              |                                          |                                        |
|                                      | MT-CYB                           | MT-ND3                               | MT-ND3        |                             |                                           |                                                   |                              |                                          |                                        |
|                                      | MT-ND2                           | MT-ND4                               | MT-ND4        |                             |                                           |                                                   |                              |                                          |                                        |
|                                      | MT-ND3                           | MT-ND5                               | MT-ND6        |                             |                                           |                                                   |                              |                                          |                                        |
|                                      | MT-ND4                           | MT-ND6                               |               |                             |                                           |                                                   |                              |                                          |                                        |
|                                      | MT-ND5                           |                                      |               |                             |                                           |                                                   |                              |                                          |                                        |
|                                      | MT-ND6                           |                                      |               |                             |                                           |                                                   |                              |                                          |                                        |

**Table S5** Cellular components significantly over-represented among the set of low abundance transcripts

| Cellular component                                                           | GO Id      | Uploaded genes | Genes in IDB | p-value  | Genes/Transcripts                                                                                           |
|------------------------------------------------------------------------------|------------|----------------|--------------|----------|-------------------------------------------------------------------------------------------------------------|
| mitochondrion                                                                | GO:0005739 | 14             | 1411         | 2.11E-06 | AGAP2; C5orf63; HSCB; MAOA; MT-ATP6; MT-CO1; MT-CO2; MT-CO3; MT-CYB; MT-ND1; MT-ND2; MT-ND3; MT-ND4; MT-ND6 |
| mitochondrial inner membrane                                                 | GO:0005743 | 12             | 353          | 6.08E-11 | MT-ATP6; MT-ATP8; MT-CO1; MT-CO2; MT-CO3; MT-CYB; MT-ND1; MT-ND2; MT-ND3; MT-ND4; MT-ND5; MT-ND6            |
| respiratory chain complex IV                                                 | GO:0045277 | 3              | 3            | 3.52E-07 | MT-CO1; MT-CO2; MT-CO3                                                                                      |
| mitochondrial respiratory chain complex I                                    | GO:0005747 | 5              | 47           | 1.10E-06 | MT-ND1; MT-ND2; MT-ND3; MT-ND4; MT-ND5                                                                      |
| mitochondrial proton-transporting ATP synthase complex                       | GO:0005753 | 2              | 21           | 0.0119   | MT-ATP6; MT-ATP8                                                                                            |
| mitochondrial respiratory chain complex IV                                   | GO:0005751 | 1              | 6            | 0.04587  | MT-CO1                                                                                                      |
| proton-transporting ATP synthase complex, coupling factor F(o)               | GO:0045263 | 1              | 6            | 0.04587  | MT-ATP6                                                                                                     |
| mitochondrial proton-transporting ATP synthase complex, coupling factor F(o) | GO:0000276 | 1              | 7            | 0.04794  | MT-ATP8                                                                                                     |
| mitochondrial respiratory chain complex III                                  | GO:0005750 | 1              | 7            | 0.04794  | MT-CYB                                                                                                      |
| small ribosomal subunit                                                      | GO:0015935 | 2              | 26           | 0.01735  | RPS28; RPS3                                                                                                 |
| cytosolic small ribosomal subunit                                            | GO:0022627 | 2              | 41           | 0.02639  | RPS28; RPS3                                                                                                 |
| neuron spine                                                                 | GO:0044309 | 1              | 4            | 0.03917  | PALM                                                                                                        |
| dendritic spine membrane                                                     | GO:0032591 | 1              | 7            | 0.04794  | PALM                                                                                                        |
| kinesin complex                                                              | GO:0005871 | 2              | 51           | 0.03225  | KIF1A; KIF1C                                                                                                |
| microtubule associated complex                                               | GO:0005875 | 2              | 33           | 0.02531  | MAP1A; PEA15                                                                                                |
| laminin-10 complex                                                           | GO:0043259 | 1              | 3            | 0.03384  | LAMA5                                                                                                       |
| laminin-11 complex                                                           | GO:0043260 | 1              | 3            | 0.03384  | LAMA5                                                                                                       |
| laminin-5 complex                                                            | GO:0005610 | 1              | 4            | 0.03917  | LAMA5                                                                                                       |
| laminin-1 complex                                                            | GO:0005606 | 1              | 7            | 0.04794  | LAMA5                                                                                                       |

**Legend:** GO;Id-cellular component defined by Gene Ontology database (GO; <http://geneontology.org>); Uploaded genes – number (no.) of genes uploaded from set of low abundance transcripts; Genes in IDB – no. of genes for Go Id present in InnateDB database (<http://www.innatedb.com>); P-value for over-representation after Benjamini Hochberg correction.

**Primer references:**

TNF (Life Technologies, TaqMan Gene Expression assay ID: Hs00174128\_m1); CO1 (TaqMan: Hs02596864\_g1); COX6A1 (TaqMan: Hs01924685\_g1); CASP3 (TaqMan: Hs00234387\_m1); DAD1 (TaqMan: Hs02912874\_m1); HSV-1 F-5'-gcagtttacgtacaaccacatacagc, R-5'-agcttgccgggcctcgtt, Probe-5'-[6FAM]-cggcccaacatatcgttgacatggc-[TAM]; CASP8 (TaqMan: Hs01018151\_m1); CASP9 (ID: Hs00154260\_m1); BAX (ID: Hs00180269\_m1); BAK1 (ID: Hs00832876\_g1); BCL2 (ID: Hs00608023\_m1); PUMA (ID: Hs00248075\_m1); NOXA (ID: Hs00560402\_m1); MCL1-1 (ID: Hs01050896\_m1); IL-6 (ID: Hs00985639\_m1)
